# Supplementary material
Source: publisher figshare collection journal article supplement (https://sage.figshare.com/ndownloader/files/14720720)
Supplement: Supplementary file 1 [file 14720720]

**Table S1. Location and organic matter properties of the surface sediments.**

| Site | Location | TOC (%) | δ13CTOC (‰) | Site | Location | TOC (%) | δ13CTOC (‰) |
| --- | --- | --- | --- | --- | --- | --- | --- |
| B156 | 29.892°N, 122.043°E | 0.30 | -22.78 | B96 | 29.703°N, 122.560°E | 0.44 | -22.38 |
| B173 | 29.927°N, 122.197°E | 0.22 | -22.88 | B100 | 29.704°N, 122.767°E | 0.42 | -21.79 |
| B127 | 29.793°N, 122.353°E | 0.39 | -22.89 | B104 | 29.704°N, 122.973°E | 0.59 | -21.01 |
| B162 | 29.884°N, 122.456°E | 0.26 | -22.56 | B71 | 29.655°N, 121.992°E | 0.33 | -23.32 |
| B164 | 29.884°N, 122.560°E | 0.37 | -22.73 | B14 | 29.521°N, 122.148°E | 0.52 | -22.76 |
| B168 | 29.884°N, 122.766°E | 0.60 | -21.83 | B18 | 29.522°N, 122.355°E | 0.45 | -22.85 |
| B172 | 29.884°N, 122.973°E | 0.33 | -21.13 | B22 | 29.523°N, 122.561°E | 0.47 | -21.80 |
| B122 | 29.791°N, 122.042°E | 0.45 | -23.06 | B26 | 29.524°N, 122.767°E | 0.45 | -21.31 |
| B107 | 29.747°N, 122.198°E | 0.37 | -22.62 | B30 | 29.524°N, 122.973°E | 0.40 | -21.16 |
| B92 | 29.702°N, 122.354°E | 0.42 | -22.73 | ECS1302 | 29.024°N, 122.371°E | 0.57 | -22.92 |

**Table S2. Geochronology and concentrations of brassicasterol and dinosterol (normalized to total organic carbon) of the core sediments.**

| Age (ca.AD) | Samples | brassicasterol (μg g-1 TOC) | dinosterol (μg g-1 TOC) | Age (ca.AD) | Samples | brassicasterol (μg g-1 TOC) | dinosterol (μg g-1 TOC) |
| --- | --- | --- | --- | --- | --- | --- | --- |
| 2009 | DZ28-1 | 51.0 | 122 | 2011 | DZ41-1 | 36.9 | 97.9 |
| 1998 | DZ28-2 | 36.3 | 109 | 2007 | DZ41-2 | 30.1 | 77.2 |
| 1987 | DZ28-3 | 35.2 | 76.8 | 2002 | DZ41-3 | 31.5 | 77.5 |
| 1976 | DZ28-4 | 33.6 | 81.6 | 1998 | DZ41-4 | 26.9 | 74.8 |
| 1965 | DZ28-5 | 26.1 | 52.8 | 1993 | DZ41-5 | 29.4 | 59.4 |
| 1953 | DZ28-6 | 25.1 | 55.5 | 1989 | DZ41-6 | 27.0 | 55.2 |
| 1942 | DZ28-7 | 26.1 | 56.4 | 1985 | DZ41-7 | 20.7 | 51.9 |
| 1931 | DZ28-8 | 19.6 | 48.7 | 1980 | DZ41-8 | 17.4 | 49.5 |
| 1920 | DZ28-9 | 20.7 | 41.0 | 1976 | DZ41-9 | 16.5 | 37.9 |
| 1909 | DZ28-10 | 22.5 | 36.1 | 1971 | DZ41-10 | 24.1 | 39.8 |
| 1897 | DZ28-11 | 17.9 | 36.1 | 1967 | DZ41-11 | 25.6 | 41.0 |
| 1886 | DZ28-12 | 20.7 | 39.4 | 1962 | DZ41-12 | 20.6 | 34.2 |
| 1875 | DZ28-13 | 26.0 | 46.6 | 1958 | DZ41-13 | 27.4 | 44.5 |
| 1864 | DZ28-14 | 29.0 | 41.8 | 1953 | DZ41-14 | 25.7 | 39.5 |
| 1852 | DZ28-15 | 25.6 | 39.7 | 1949 | DZ41-15 | 29.1 | 44.3 |
